# Supplementary material for: Polymorphisms within Autophagy-Related Genes as Susceptibility Biomarkers for Multiple Myeloma: A Meta-Analysis of Three Large Cohorts and Functional Characterization
Source: MDPI journal article supplement (doi:10.3390/ijms24108500), 2023-05-09
Supplement: s1 [file s1]

**Supplementary Table 4.** Serum and plasma metabolites measured in the HFGP cohort

| Serum_markers              |            |            |       |          | Plasma_markers        |       |
|----------------------------|------------|------------|-------|----------|-----------------------|-------|
| Panel                      | Assay      | Uniprot ID | Units | OlinkID  | Assay                 | Units |
| Olink INFLAMMATION(v.3021) | 4E-BP1     | Q13541     |       | OID00536 | hsCRP                 | ug/mL |
| Olink INFLAMMATION(v.3021) | ADA        | P00813     |       | OID00560 | IL18bpx               | pg/mL |
| Olink INFLAMMATION(v.3021) | ARTN       | Q5T4W7     |       | OID00526 | Resistin              | ng/mL |
| Olink INFLAMMATION(v.3021) | AXIN1      | O15169     |       | OID00487 | Leptin                | ng/mL |
| Olink INFLAMMATION(v.3021) | Beta-NGF   | P01138     |       | OID00519 | Adiponectin           | ug/mL |
| Olink INFLAMMATION(v.3021) | CASP-8     | Q14790     |       | OID00550 | AAT                   | mg/mL |
| Olink INFLAMMATION(v.3021) | CCL11      | P51671     |       | OID00505 | IL-1Ra_Q (Quantikine) | pg/mL |
| Olink INFLAMMATION(v.3021) | CCL19      | Q99731     |       | OID00513 | IL18 pg/mL            | pg/mL |
| Olink INFLAMMATION(v.3021) | CCL20      | P78556     |       | OID00556 | IL-1b pg/mL           | pg/mL |
| Olink INFLAMMATION(v.3021) | CCL23      | P55773     |       | OID00530 | IL-6 pg/mL            | pg/mL |
| Olink INFLAMMATION(v.3021) | CCL25      | O15444     |       | OID00551 | VEGF-A                | pg/mL |
| Olink INFLAMMATION(v.3021) | CCL28      | Q9NRJ3     |       | OID00539 |                       |       |
| Olink INFLAMMATION(v.3021) | CCL3       | P10147     |       | OID00532 |                       |       |
| Olink INFLAMMATION(v.3021) | CCL4       | P13236     |       | OID00498 |                       |       |
| Olink INFLAMMATION(v.3021) | CD244      | Q9BZW8     |       | OID00477 |                       |       |
| Olink INFLAMMATION(v.3021) | CD40       | P25942     |       | OID00542 |                       |       |
| Olink INFLAMMATION(v.3021) | CD5        | P06127     |       | OID00531 |                       |       |
| Olink INFLAMMATION(v.3021) | CD6        | P30203     |       | OID00499 |                       |       |
| Olink INFLAMMATION(v.3021) | CD8A       | P01732     |       | OID05124 |                       |       |
| Olink INFLAMMATION(v.3021) | CDCP1      | Q9H5V8     |       | OID00476 |                       |       |
| Olink INFLAMMATION(v.3021) | CSF-1      | P09603     |       | OID00562 |                       |       |
| Olink INFLAMMATION(v.3021) | CST5       | P28325     |       | OID00491 |                       |       |
| Olink INFLAMMATION(v.3021) | CX3CL1     | P78423     |       | OID00552 |                       |       |
| Olink INFLAMMATION(v.3021) | CXCL1      | P09341     |       | OID00496 |                       |       |
| Olink INFLAMMATION(v.3021) | CXCL10     | P02778     |       | OID00535 |                       |       |
| Olink INFLAMMATION(v.3021) | CXCL11     | O14625     |       | OID00486 |                       |       |
| Olink INFLAMMATION(v.3021) | CXCL5      | P42830     |       | OID00520 |                       |       |
| Olink INFLAMMATION(v.3021) | CXCL6      | P80162     |       | OID00534 |                       |       |
| Olink INFLAMMATION(v.3021) | CXCL9      | Q07325     |       | OID00490 |                       |       |
| Olink INFLAMMATION(v.3021) | DNER       | Q8NFT8     |       | OID01213 |                       |       |
| Olink INFLAMMATION(v.3021) | EN-RAGE    | P80511     |       | OID00541 |                       |       |
| Olink INFLAMMATION(v.3021) | FGF-19     | O95750     |       | OID00545 |                       |       |
| Olink INFLAMMATION(v.3021) | FGF-21     | Q9NSA1     |       | OID00512 |                       |       |
| Olink INFLAMMATION(v.3021) | FGF-23     | Q9GZV9     |       | OID00507 |                       |       |
| Olink INFLAMMATION(v.3021) | FGF-5      | P12034     |       | OID00509 |                       |       |
| Olink INFLAMMATION(v.3021) | Flt3L      | P49771     |       | OID00533 |                       |       |
| Olink INFLAMMATION(v.3021) | GDNF       | P39905     |       | OID00475 |                       |       |
| Olink INFLAMMATION(v.3021) | HGF        | P14210     |       | OID00522 |                       |       |
| Olink INFLAMMATION(v.3021) | IFN-gamma  | P01579     |       | OID05547 |                       |       |
| Olink INFLAMMATION(v.3021) | IL-1 alpha | P01583     |       | OID00493 |                       |       |
| Olink INFLAMMATION(v.3021) | IL10       | P22301     |       | OID00528 |                       |       |
| Olink INFLAMMATION(v.3021) | IL-10RA    | Q13651     |       | OID00508 |                       |       |
| Olink INFLAMMATION(v.3021) | IL-10RB    | Q08334     |       | OID00515 |                       |       |
| Olink INFLAMMATION(v.3021) | IL-12B     | P29460     |       | OID00523 |                       |       |
| Olink INFLAMMATION(v.3021) | IL13       | P35225     |       | OID00525 |                       |       |
| Olink INFLAMMATION(v.3021) | IL-15RA    | Q13261     |       | OID00514 |                       |       |
| Olink INFLAMMATION(v.3021) | IL-17A     | Q16552     |       | OID00485 |                       |       |
| Olink INFLAMMATION(v.3021) | IL-17C     | Q9P0M4     |       | OID00483 |                       |       |

|                            |                |        |          |
|----------------------------|----------------|--------|----------|
| Olink INFLAMMATION(v.3021) | IL18           | Q14116 | OID00501 |
| Olink INFLAMMATION(v.3021) | IL-18R1        | Q13478 | OID00517 |
| Olink INFLAMMATION(v.3021) | IL2            | P60568 | OID00495 |
| Olink INFLAMMATION(v.3021) | IL-20          | Q9NYY1 | OID00537 |
| Olink INFLAMMATION(v.3021) | IL-20RA        | Q9UHF4 | OID00489 |
| Olink INFLAMMATION(v.3021) | IL-22 RA1      | Q8N6P7 | OID00516 |
| Olink INFLAMMATION(v.3021) | IL-24          | Q13007 | OID00524 |
| Olink INFLAMMATION(v.3021) | IL-2RB         | P14784 | OID00492 |
| Olink INFLAMMATION(v.3021) | IL33           | O95760 | OID00543 |
| Olink INFLAMMATION(v.3021) | IL4            | P05112 | OID00546 |
| Olink INFLAMMATION(v.3021) | IL5            | P05113 | OID00559 |
| Olink INFLAMMATION(v.3021) | IL6            | P05231 | OID00482 |
| Olink INFLAMMATION(v.3021) | IL7            | P13232 | OID00478 |
| Olink INFLAMMATION(v.3021) | IL8            | P10145 | OID00471 |
| Olink INFLAMMATION(v.3021) | LAP TGF-beta-1 | P01137 | OID00480 |
| Olink INFLAMMATION(v.3021) | LIF            | P15018 | OID00547 |
| Olink INFLAMMATION(v.3021) | LIF-R          | P42702 | OID00511 |
| Olink INFLAMMATION(v.3021) | MCP-1          | P13500 | OID00484 |
| Olink INFLAMMATION(v.3021) | MCP-2          | P80075 | OID00549 |
| Olink INFLAMMATION(v.3021) | MCP-3          | P80098 | OID00474 |
| Olink INFLAMMATION(v.3021) | MCP-4          | Q99616 | OID00504 |
| Olink INFLAMMATION(v.3021) | MMP-1          | P03956 | OID00510 |
| Olink INFLAMMATION(v.3021) | MMP-10         | P09238 | OID00527 |
| Olink INFLAMMATION(v.3021) | NRTN           | Q99748 | OID00548 |
| Olink INFLAMMATION(v.3021) | NT-3           | P20783 | OID00554 |
| Olink INFLAMMATION(v.3021) | OPG            | O00300 | OID00479 |
| Olink INFLAMMATION(v.3021) | OSM            | P13725 | OID00494 |
| Olink INFLAMMATION(v.3021) | PD-L1          | Q9NZQ7 | OID00518 |
| Olink INFLAMMATION(v.3021) | SCF            | P21583 | OID00500 |
| Olink INFLAMMATION(v.3021) | SIRT2          | Q8IXJ6 | OID00538 |
| Olink INFLAMMATION(v.3021) | SLAMF1         | Q13291 | OID00502 |
| Olink INFLAMMATION(v.3021) | ST1A1          | P50225 | OID00557 |
| Olink INFLAMMATION(v.3021) | STAMBP         | O95630 | OID00558 |
| Olink INFLAMMATION(v.3021) | TGF-alpha      | P01135 | OID00503 |
| Olink INFLAMMATION(v.3021) | TNF            | P01375 | OID05548 |
| Olink INFLAMMATION(v.3021) | TNFB           | P01374 | OID00561 |
| Olink INFLAMMATION(v.3021) | TNFRSF9        | Q07011 | OID00553 |
| Olink INFLAMMATION(v.3021) | TNFSF14        | O43557 | OID00506 |
| Olink INFLAMMATION(v.3021) | TRAIL          | P50591 | OID00488 |
| Olink INFLAMMATION(v.3021) | TRANCE         | O14788 | OID00521 |
| Olink INFLAMMATION(v.3021) | TSLP           | Q969D9 | OID00497 |
| Olink INFLAMMATION(v.3021) | TWEAK          | O43508 | OID00555 |
| Olink INFLAMMATION(v.3021) | uPA            | P00749 | OID00481 |
| Olink INFLAMMATION(v.3021) | VEGFA          | P15692 | OID00472 |
