# Supplementary material for: Polymorphisms within Autophagy-Related Genes as Susceptibility Biomarkers for Multiple Myeloma: A Meta-Analysis of Three Large Cohorts and Functional Characterization
Source: MDPI journal article supplement (doi:10.3390/ijms24108500), 2023-05-09
Supplement: s1 [file s1]

**Supplementary Table 2.** Selected autophagy-related SNPs.

| Chr | Position (GRCh37) | dbSNP rs#   | Nucleotide substitution | Amino acid substitution | Gene           | MAF (CEU) |
|-----|-------------------|-------------|-------------------------|-------------------------|----------------|-----------|
| 1   | 3595768           | rs10910008  | C/G                     | intronic                | TP73           | C=0.618   |
| 1   | 161841018         | rs112462458 | G/T                     | intronic                | ATF6           | G=0.981   |
| 1   | 242159710         | rs114367814 | G/T                     | intronic                | MAP1LC3C       | G=0.939   |
| 1   | 110133967         | rs116212438 | T/C                     | intronic                | GNAI3          | T=0.989   |
| 1   | 87173249          | rs12409329  | T/C                     | intronic                | SH3GLB1        | T=0.933   |
| 1   | 223901842         | rs142942507 | C/G                     | intronic                | CAPN2          | C=0.983   |
| 1   | 226587507         | rs143161050 | T/C                     | intronic                | PARP1          | T=0.984   |
| 1   | 10551365          | rs147964123 | C/G                     | intronic                | PEX14          | C=0.980   |
| 1   | 161853671         | rs148690272 | G/T                     | intronic                | ATF6           | G=0.980   |
| 1   | 3639884           | rs149926186 | T/C                     | intronic                | TP73           | T=0.986   |
| 1   | 63284830          | rs17123872  | G/A                     | exonic                  | ATG4C          | G=0.972   |
| 1   | 11273213          | rs17374795  | A/G                     | intronic                | MTOR           | A=0.978   |
| 1   | 206641052         | rs17433804  | C/T                     | intergenic              | SRGAP2,IKBKE   | C=0.689   |
| 1   | 206648037         | rs2297546   | C/G                     | intronic                | IKBKE          | C=0.600   |
| 1   | 206647218         | rs12739461  | A/G                     | UTR5                    | IKBKE          | A=0.753   |
| 1   | 87207872          | rs263478    | G/T                     | intronic                | SH3GLB1        | G=0.862   |
| 1   | 207965427         | rs1142469   | G/A                     | intronic                | CD46           | A=0.845   |
| 1   | 226569987         | rs3219069   | G/A                     | intronic                | PARP1          | G=0.975   |
| 1   | 207931996         | rs35677203  | A/T                     | intronic                | CD46           | A=0.926   |
| 1   | 161765834         | rs35699192  | G/A                     | intronic                | ATF6           | G=0.986   |
| 1   | 160183740         | rs41265779  | C/T                     | UTR3                    | PEA15          | C=0.969   |
| 1   | 206665240         | rs41299852  | T/C                     | intronic                | IKBKE          | T=0.972   |
| 1   | 87170417          | rs58494650  | C/T                     | UTR5                    | SH3GLB1        | C=0.972   |
| 1   | 20956912          | rs61781981  | G/A                     | intergenic              | CDA,PINK1      | G=0.943   |
| 1   | 87169118          | rs61802920  | T/C                     | intergenic              | CLCA3P,SH3GLB1 | T=0.908   |
| 1   | 3572688           | rs6663736   | T/C                     | intronic                | TP73           | T=0.698   |
| 1   | 87173963          | rs74871690  | T/C                     | intronic                | SH3GLB1        | T=0.972   |

|   |           |             |     |            |              |         |
|---|-----------|-------------|-----|------------|--------------|---------|
| 1 | 10615982  | rs78432262  | G/A | intronic   | PEX14        | G=0.947 |
| 1 | 11185739  | rs79373174  | G/A | intronic   | MTOR         | G=0.899 |
| 1 | 10568140  | rs79776554  | C/T | intronic   | PEX14        | C=0.986 |
| 1 | 160183100 | rs8175359   | G/A | intronic   | PEA15        | G=0.974 |
| 2 | 183862903 | rs115885826 | C/T | intronic   | NCKAP1       | C=0.981 |
| 2 | 37343771  | rs116285413 | A/G | intronic   | EIF2AK2      | A=0.988 |
| 2 | 32663128  | rs147477721 | A/G | intronic   | BIRC6        | A=0.981 |
| 2 | 32610642  | rs147749755 | A/G | intronic   | BIRC6        | A=0.989 |
| 2 | 32646160  | rs151116561 | C/G | intronic   | BIRC6        | C=0.987 |
| 2 | 173321021 | rs16860435  | A/G | intronic   | ITGA6        | A=0.943 |
| 2 | 136873549 | rs2680880   | A/T | UTR5       | CXCR4        | A=0.582 |
| 2 | 183856033 | rs34565726  | C/T | intronic   | NCKAP1       | C=0.985 |
| 2 | 32603640  | rs4019436   | C/G | intronic   | BIRC6        | C=0.691 |
| 2 | 136880385 | rs59222832  | T/C | intergenic | CXCR4,THSD7B | T=0.883 |
| 2 | 32592318  | rs62136267  | G/T | intronic   | BIRC6        | G=0.821 |
| 2 | 32605698  | rs6748386   | A/G | intronic   | BIRC6        | G=0.946 |
| 2 | 37339084  | rs7577041   | A/C | intronic   | EIF2AK2      | A=0.735 |
| 3 | 189395209 | rs10049471  | G/A | intronic   | TP63         | G=0.567 |
| 3 | 189399069 | rs111534976 | A/G | intronic   | TP63         | A=0.951 |
| 3 | 41942795  | rs112132603 | C/T | intronic   | ULK4         | C=0.982 |
| 3 | 41417969  | rs112607713 | C/T | intronic   | ULK4         | C=0.937 |
| 3 | 11372520  | rs114851724 | A/G | intronic   | ATG7         | A=0.977 |
| 3 | 5227522   | rs115578554 | G/A | intergenic | ARL8B,EDEM1  | G=0.977 |
| 3 | 4552969   | rs115769448 | A/T | intronic   | ITPR1        | A=0.987 |
| 3 | 172240458 | rs115861969 | A/G | intronic   | TNFSF10      | A=0.981 |
| 3 | 11570026  | rs116166360 | C/T | intronic   | ATG7         | C=0.982 |
| 3 | 189498124 | rs12486980  | C/T | intronic   | TP63         | C=0.902 |
| 3 | 128522922 | rs12493061  | A/C | intronic   | RAB7A        | A=0.971 |
| 3 | 189495337 | rs13095322  | G/A | intronic   | TP63         | G=0.901 |
| 3 | 11325549  | rs138578039 | C/T | intronic   | ATG7         | C=0.979 |

|   |           |             |     |              |         |         |
|---|-----------|-------------|-----|--------------|---------|---------|
| 3 | 41368080  | rs139438255 | G/A | intronic     | ULK4    | G=0.982 |
| 3 | 183390462 | rs139710544 | G/A | intronic     | KLHL24  | G=0.966 |
| 3 | 189608067 | rs142526070 | C/T | intronic     | TP63    | C=0.978 |
| 3 | 41302942  | rs144700803 | C/T | intronic     | ULK4    | C=0.978 |
| 3 | 87288213  | rs146749265 | G/C | intronic     | CHMP2B  | G=0.984 |
| 3 | 87279318  | rs1488362   | C/G | intronic     | CHMP2B  | C=0.552 |
| 3 | 41494653  | rs149188609 | C/A | intronic     | ULK4    | C=0.989 |
| 3 | 5239700   | rs150377008 | C/T | intronic     | EDEM1   | C=0.970 |
| 3 | 4637939   | rs17041030  | C/T | intronic     | ITPR1   | C=0.620 |
| 3 | 4793006   | rs17041333  | T/G | ncRNA_exonic | EGOT    | T=0.983 |
| 3 | 4876515   | rs17041517  | G/A | intronic     | ITPR1   | A=0.506 |
| 3 | 172240215 | rs1823227   | T/G | intronic     | TNFSF10 | T=0.703 |
| 3 | 19991202  | rs191668575 | A/G | intronic     | RAB5A   | A=0.989 |
| 3 | 189567818 | rs2056124   | G/C | intronic     | TP63    | C=0.706 |
| 3 | 41312821  | rs2371487   | G/A | intronic     | ULK4    | G=0.889 |
| 3 | 4641530   | rs2686621   | C/T | intronic     | ITPR1   | T=0.950 |
| 3 | 189596662 | rs2889923   | T/C | intronic     | TP63    | T=0.985 |
| 3 | 46400062  | rs3092960   | G/A | exonic       | CCR2    | G=0.866 |
| 3 | 4580685   | rs34253984  | C/G | intronic     | ITPR1   | C=0.948 |
| 3 | 4714920   | rs35789999  | A/G | exonic       | ITPR1   | A=0.981 |
| 3 | 4717972   | rs35826345  | G/A | intronic     | ITPR1   | G=0.862 |
| 3 | 87276571  | rs36098294  | C/T | UTR5         | CHMP2B  | C=0.981 |
| 3 | 4743623   | rs3792491   | C/A | intronic     | ITPR1   | C=0.883 |
| 3 | 4628541   | rs4685771   | C/T | intronic     | ITPR1   | C=0.890 |
| 3 | 4877937   | rs4685831   | C/G | intronic     | ITPR1   | C=0.864 |
| 3 | 41829397  | rs4973892   | A/G | intronic     | ULK4    | A=0.546 |
| 3 | 4674710   | rs56310584  | C/G | intronic     | ITPR1   | C=0.932 |
| 3 | 41571253  | rs62256860  | G/A | intronic     | ULK4    | G=0.966 |
| 3 | 189509595 | rs62279941  | T/C | intronic     | TP63    | T=0.936 |
| 3 | 184052420 | rs62287502  | G/T | intronic     | EIF4G1  | G=0.966 |

|   |           |             |     |              |              |         |
|---|-----------|-------------|-----|--------------|--------------|---------|
| 3 | 4630987   | rs6442889   | G/A | intronic     | ITPR1        | G=0.877 |
| 3 | 189393745 | rs6780531   | A/G | intronic     | TP63         | G=0.759 |
| 3 | 4666434   | rs6797564   | C/G | intronic     | ITPR1        | C=0.966 |
| 3 | 19983631  | rs71316239  | C/T | intergenic   | EFHB,RAB5A   | C=0.839 |
| 3 | 41310016  | rs73083808  | G/A | intronic     | ULK4         | G=0.963 |
| 3 | 41786009  | rs6599175   | G/A | intronic     | ULK4         | G=0.969 |
| 3 | 189364425 | rs75579144  | G/A | intronic     | TP63         | G=0.957 |
| 3 | 189547735 | rs75715827  | T/C | ncRNA_exonic | MIR944       | T=0.923 |
| 3 | 189406870 | rs77953198  | C/T | intronic     | TP63         | C=0.974 |
| 3 | 189353729 | rs78392253  | A/G | intronic     | TP63         | A=0.985 |
| 3 | 4691378   | rs78619297  | G/T | intronic     | ITPR1        | G=0.901 |
| 3 | 41571944  | rs80350031  | T/C | intronic     | ULK4         | T=0.976 |
| 3 | 189363575 | rs9823045   | C/G | intronic     | TP63         | G=0.516 |
| 3 | 189364890 | rs9824378   | T/G | intronic     | TP63         | G=0.880 |
| 3 | 41533596  | rs9839278   | A/C | intronic     | ULK4         | A=0.598 |
| 3 | 184038874 | rs9846954   | A/T | intronic     | EIF4G1       | A=0.751 |
| 3 | 4861852   | rs9858749   | A/G | intronic     | ITPR1        | G=0.935 |
| 3 | 41716317  | rs994439    | G/A | intronic     | ULK4         | A=0.514 |
| 4 | 94329816  | rs114744335 | A/G | intronic     | GRID2        | A=0.989 |
| 4 | 94583170  | rs115503484 | C/G | intronic     | GRID2        | C=0.988 |
| 4 | 94252722  | rs11943480  | A/C | intronic     | GRID2        | C=0.680 |
| 4 | 85869836  | rs138984092 | C/T | intronic     | WDFY3        | C=0.983 |
| 4 | 93375222  | rs140568366 | T/C | intronic     | GRID2        | T=0.985 |
| 4 | 85646032  | rs144150483 | T/A | intronic     | WDFY3        | T=0.986 |
| 4 | 93752534  | rs17019918  | A/G | intronic     | GRID2        | A=0.957 |
| 4 | 164056625 | rs17574945  | C/T | intronic     | NAF1         | C=0.938 |
| 4 | 93806504  | rs190962045 | A/C | intronic     | GRID2        | A=0.989 |
| 4 | 103536673 | rs4648136   | C/T | intronic     | NFKB1        | C=0.974 |
| 4 | 185575142 | rs4862399   | A/G | intronic     | PRIMPOL      | A=0.842 |
| 4 | 140371510 | rs62323106  | T/C | intergenic   | NAA15,RAB33B | T=0.903 |

|   |           |             |     |            |               |         |
|---|-----------|-------------|-----|------------|---------------|---------|
| 4 | 94447295  | rs6819321   | C/T | intronic   | GRID2         | C=0.559 |
| 4 | 93867037  | rs71599264  | C/T | intronic   | GRID2         | C=0.973 |
| 4 | 93259371  | rs76688871  | A/G | intronic   | GRID2         | A=0.973 |
| 4 | 93232542  | rs79610780  | C/T | intronic   | GRID2         | C=0.979 |
| 4 | 103442022 | rs79843117  | T/C | intronic   | NFKB1         | T=0.989 |
| 5 | 179694760 | rs10058502  | A/G | intronic   | MAPK9         | A=0.708 |
| 5 | 78106262  | rs10474568  | G/T | intronic   | ARSB          | G=0.988 |
| 5 | 139237820 | rs114578583 | G/A | intronic   | NRG2          | G=0.989 |
| 5 | 81291199  | rs147143324 | C/T | intronic   | ATG10         | C=0.959 |
| 5 | 78279820  | rs163129    | G/A | intronic   | ARSB          | G=0.867 |
| 5 | 81469580  | rs16899380  | A/T | intronic   | ATG10         | A=0.825 |
| 5 | 179677940 | rs17683933  | T/G | intronic   | MAPK9         | T=0.879 |
| 5 | 180670858 | rs2241369   | G/C | UTR5       | GNB2L1        | G=0.967 |
| 5 | 180663035 | rs2261114   | G/C | downstream | GNB2L1,TRIM41 | G=0.622 |
| 5 | 78073245  | rs3088247   | C/A | UTR3       | ARSB          | C=0.749 |
| 5 | 78116136  | rs339027    | C/G | intronic   | ARSB          | C=0.802 |
| 5 | 78130051  | rs339030    | C/T | intronic   | ARSB          | C=0.783 |
| 5 | 115165913 | rs35179959  | C/A | UTR3       | ATG12         | C=0.813 |
| 5 | 78284877  | rs4279321   | A/G | intergenic | ARSB,DMGDH    | A=0.882 |
| 5 | 78144104  | rs55638484  | T/C | intronic   | ARSB          | T=0.865 |
| 5 | 78126561  | rs62377505  | C/A | intronic   | ARSB          | C=0.762 |
| 5 | 179141391 | rs62404346  | A/C | intronic   | CANX          | A=0.588 |
| 5 | 139245762 | rs6580288   | A/G | intronic   | NRG2          | A=0.846 |
| 5 | 81438449  | rs74793677  | A/G | intronic   | ATG10         | A=0.987 |
| 5 | 139253738 | rs77893406  | G/A | intronic   | NRG2          | G=0.984 |
| 6 | 162141896 | rs1018462   | A/G | intronic   | PARK2         | A=0.658 |
| 6 | 117892414 | rs11153675  | G/C | intronic   | GOPC          | G=0.926 |
| 6 | 108880652 | rs113490969 | C/T | upstream   | FOXO3         | C=0.979 |
| 6 | 106694600 | rs117077419 | T/C | intronic   | ATG5          | T=0.978 |
| 6 | 162316655 | rs117287596 | T/C | intronic   | PARK2         | T=0.761 |

|   |           |             |     |            |          |         |
|---|-----------|-------------|-----|------------|----------|---------|
| 6 | 161794839 | rs12194727  | C/T | intronic   | PARK2    | C=0.799 |
| 6 | 41667037  | rs13206766  | C/T | intronic   | TFEB     | C=0.756 |
| 6 | 41656640  | rs13213655  | G/A | intronic   | TFEB     | G=0.912 |
| 6 | 106667994 | rs2299864   | C/T | downstream | ATG5     | C=0.814 |
| 6 | 162319583 | rs13437405  | C/T | intronic   | PARK2    | C=0.975 |
| 6 | 162662827 | rs138228179 | G/T | intronic   | PARK2    | G=0.985 |
| 6 | 106745263 | rs142985032 | T/G | intronic   | ATG5     | T=0.988 |
| 6 | 161890191 | rs143450375 | T/C | intronic   | PARK2    | T=0.964 |
| 6 | 162859217 | rs143750818 | C/T | intronic   | PARK2    | C=0.971 |
| 6 | 162656566 | rs147237284 | G/A | intronic   | PARK2    | G=0.986 |
| 6 | 162011458 | rs147775335 | C/T | intronic   | PARK2    | C=0.984 |
| 6 | 36655513  | rs148683340 | C/T | downstream | CDKN1A   | C=0.985 |
| 6 | 162249989 | rs150958341 | C/T | intronic   | PARK2    | C=0.973 |
| 6 | 162216058 | rs187181677 | A/G | intronic   | PARK2    | A=0.963 |
| 6 | 162442344 | rs2851400   | G/A | intronic   | PARK2    | T=0.648 |
| 6 | 44214488  | rs34094794  | C/T | intronic   | HSP90AB1 | C=0.897 |
| 6 | 44215784  | rs34124063  | A/T | intronic   | HSP90AB1 | T=0.683 |
| 6 | 162932218 | rs34235347  | C/A | intronic   | PARK2    | C=0.864 |
| 6 | 41702357  | rs34313611  | A/T | intergenic | PGC      | A=0.907 |
| 6 | 162947874 | rs34665989  | G/A | intronic   | PARK2    | G=0.832 |
| 6 | 162447623 | rs34706458  | T/A | intronic   | PARK2    | T=0.930 |
| 6 | 44215556  | rs34917612  | G/A | intronic   | HSP90AB1 | G=0.953 |
| 6 | 162162658 | rs35621098  | G/A | intronic   | PARK2    | G=0.989 |
| 6 | 162896720 | rs4709629   | C/T | intronic   | PARK2    | T=0.530 |
| 6 | 161897689 | rs61114332  | C/T | intronic   | PARK2    | T=0.583 |
| 6 | 162752612 | rs62430696  | T/C | intronic   | PARK2    | T=0.986 |
| 6 | 161825925 | rs62435929  | T/A | intronic   | PARK2    | T=0.982 |
| 6 | 162265991 | rs62436137  | G/A | intronic   | PARK2    | G=0.940 |
| 6 | 162117092 | rs67965942  | T/C | intronic   | PARK2    | T=0.890 |
| 6 | 162808350 | rs6899614   | C/G | intronic   | PARK2    | G=0.983 |

|   |           |             |     |            |              |         |
|---|-----------|-------------|-----|------------|--------------|---------|
| 6 | 106728695 | rs6906688   | T/A | intronic   | ATG5         | T=0.907 |
| 6 | 162803587 | rs6912641   | C/A | intronic   | PARK2        | C=0.757 |
| 6 | 41666065  | rs6916515   | G/A | intronic   | TFEB         | G=0.858 |
| 6 | 162472401 | rs73030487  | T/C | intronic   | PARK2        | T=0.986 |
| 6 | 162292876 | rs74950972  | C/T | intronic   | GOPC         | C=0.982 |
| 6 | 162253773 | rs75169534  | T/G | intronic   | PARK2        | T=0.983 |
| 6 | 161801043 | rs75786741  | G/A | intronic   | PARK2        | G=0.972 |
| 6 | 162302879 | rs76388920  | T/C | intronic   | PARK2        | T=0.985 |
| 6 | 162234333 | rs7739802   | C/T | intronic   | PARK2        | T=0.535 |
| 6 | 161840889 | rs7745681   | C/T | intronic   | PARK2        | C=0.852 |
| 6 | 161864017 | rs78224461  | T/C | intronic   | PARK2        | C=0.893 |
| 6 | 162977857 | rs79575917  | C/A | intronic   | PARK2        | C=0.901 |
| 6 | 161952553 | rs80011918  | C/T | intronic   | PARK2        | T=0.975 |
| 6 | 162161666 | rs1884158   | T/C | intronic   | PARK2        | T=0.697 |
| 6 | 162609719 | rs9295184   | C/T | intronic   | PARK2        | G=0.598 |
| 6 | 161970752 | rs9346864   | A/G | intronic   | PARK2        | C=0.652 |
| 6 | 161847010 | rs9355898   | T/C | intronic   | PARK2        | C=0.704 |
| 6 | 162163506 | rs9364611   | G/A | intronic   | PARK2        | C=0.851 |
| 6 | 162278027 | rs9364614   | T/A | intronic   | PARK2        | T=0.503 |
| 6 | 161988513 | rs9456684   | C/T | intronic   | PARK2        | C=0.508 |
| 6 | 162606080 | rs9458476   | C/T | intronic   | PARK2        | C=0.949 |
| 6 | 41651447  | rs9471625   | A/T | intronic   | PARK2        | C=0.642 |
| 7 | 5230230   | rs10273502  | C/G | intronic   | WIPI2        | C=0.968 |
| 7 | 55180094  | rs111744584 | C/A | intronic   | EGFR         | C=0.984 |
| 7 | 6411978   | rs113136758 | G/A | intergenic | FAM220A,RAC1 | G=0.943 |
| 7 | 55156673  | rs117729456 | G/A | intronic   | EGFR         | G=0.969 |
| 7 | 150723448 | rs117897473 | G/C | intergenic | ATG9B,ABCB8  | G=0.961 |
| 7 | 55156803  | rs202028278 | A/G | intronic   | EGFR         | A=0.683 |
| 7 | 55213918  | rs2072453   | A/C | intronic   | EGFR         | C=0.548 |
| 7 | 55265354  | rs2740763   | A/T | intronic   | EGFR         | T=0.722 |

|   |           |             |     |            |                   |         |
|---|-----------|-------------|-----|------------|-------------------|---------|
| 7 | 108215858 | rs4727713   | G/A | downstream | DNAJB9            | G=0.917 |
| 7 | 55182730  | rs4947977   | G/A | intronic   | EGFR              | A=0.533 |
| 7 | 55200398  | rs62459768  | G/C | intronic   | EGFR              | G=0.937 |
| 7 | 151166463 | rs73154847  | A/G | intronic   | RHEB              | A=0.964 |
| 7 | 151205276 | rs73154878  | C/T | intronic   | RHEB              | C=0.970 |
| 7 | 55093086  | rs78910000  | T/C | intronic   | EGFR              | T=0.981 |
| 7 | 55082949  | rs79015116  | G/A | intergenic | LOC100996654,EGFR | G=0.984 |
| 7 | 55206861  | rs887824    | G/T | intronic   | EGFR              | G=0.921 |
| 7 | 105890056 | rs9034      | A/G | UTR3       | NAMPT             | C=0.673 |
| 7 | 105906643 | rs929604    | T/C | intronic   | NAMPT             | T=0.978 |
| 7 | 5260487   | rs9987030   | C/T | intronic   | WIPI2             | C=0.823 |
| 8 | 42143739  | rs10099598  | G/A | intronic   | IKBKB             | A=0.958 |
| 8 | 13044688  | rs10108106  | T/C | intronic   | DLC1              | T=0.574 |
| 8 | 13147046  | rs116894784 | C/T | intronic   | DLC1              | C=0.988 |
| 8 | 32178217  | rs117070246 | C/A | intronic   | NRG1              | C=0.905 |
| 8 | 31617362  | rs117192588 | T/C | intronic   | NRG1              | T=0.989 |
| 8 | 32473270  | rs11780520  | C/T | intronic   | NRG1              | C=0.877 |
| 8 | 31548094  | rs12682592  | G/A | intronic   | NRG1              | G=0.772 |
| 8 | 13080275  | rs13250979  | C/T | intronic   | DLC1              | C=0.913 |
| 8 | 32145300  | rs139956466 | C/T | intronic   | NRG1              | C=0.987 |
| 8 | 37883997  | rs146163967 | C/T | intergenic | ADRB3,EIF4EBP1    | C=0.929 |
| 8 | 32571781  | rs150171844 | C/A | intronic   | NRG1              | C=0.971 |
| 8 | 12990734  | rs17553593  | C/A | UTR5       | DLC1              | C=0.731 |
| 8 | 32517515  | rs17728839  | A/G | intronic   | NRG1              | A=0.941 |
| 8 | 13272087  | rs17817533  | C/G | intronic   | DLC1              | C=0.920 |
| 8 | 32433685  | rs2439299   | A/C | intronic   | NRG1              | A=0.537 |
| 8 | 13270805  | rs28642075  | A/C | intronic   | DLC1              | C=0.540 |
| 8 | 31813471  | rs327388    | C/A | intronic   | NRG1              | C=0.979 |
| 8 | 32264790  | rs4035324   | A/T | intronic   | NRG1              | A=0.581 |
| 8 | 32474622  | rs4535704   | A/G | intronic   | NRG1              | A=0.634 |



|    |           |             |     |              |                |         |
|----|-----------|-------------|-----|--------------|----------------|---------|
| 8  | 128750540 | rs4645959   | A/G | exonic       | MYC            | A=0.953 |
| 8  | 32451286  | rs4733363   | A/T | intronic     | NRG1           | A=0.616 |
| 8  | 11699730  | rs4841601   | T/C | downstream   | CTSB           | T=0.659 |
| 8  | 13181803  | rs62492886  | C/T | intronic     | DLC1           | C=0.953 |
| 8  | 12990354  | rs7013311   | C/T | intronic     | DLC1           | C=0.969 |
| 8  | 13294495  | rs74515132  | C/T | intronic     | DLC1           | C=0.969 |
| 8  | 32175181  | rs76825279  | C/T | intronic     | NRG1           | C=0.891 |
| 8  | 32425752  | rs77544541  | C/A | intronic     | NRG1           | C=0.981 |
| 8  | 42131010  | rs77896899  | C/T | intronic     | IKBKB          | C=0.961 |
| 8  | 31537548  | rs77929613  | A/G | intronic     | NRG1           | A=0.968 |
| 8  | 13145046  | rs78027969  | G/A | intronic     | DLC1           | G=0.969 |
| 8  | 26253189  | rs78067841  | C/T | intronic     | BNIP3L         | C=0.681 |
| 8  | 32024592  | rs7833041   | T/G | intronic     | NRG1           | T=0.974 |
| 8  | 37892543  | rs79396024  | C/T | intronic     | EIF4EBP1       | C=0.979 |
| 8  | 32596669  | rs79572378  | G/A | intronic     | NRG1           | G=0.966 |
| 8  | 13275576  | rs9657216   | T/G | intronic     | DLC1           | G=0.632 |
| 9  | 90269214  | rs10512188  | T/C | intronic     | DAPK1          | T=0.882 |
| 9  | 90294733  | rs11141943  | C/G | intronic     | DAPK1          | C=0.981 |
| 9  | 90277099  | rs117318552 | C/G | intronic     | DAPK1          | C=0.968 |
| 9  | 135798121 | rs117986467 | G/A | intronic     | TSC1           | G=0.987 |
| 9  | 25676072  | rs12555144  | C/A | downstream   | TUSC1          | A=0.600 |
| 9  | 90108646  | rs13296984  | C/T | intergenic   | C9orf170,DAPK1 | G=0.527 |
| 9  | 90191415  | rs147351813 | T/C | intronic     | DAPK1          | T=0.986 |
| 9  | 90229542  | rs17480679  | G/A | intronic     | DAPK1          | G=0.959 |
| 9  | 21980744  | rs3731227   | G/A | intronic     | CDKN2A         | G=0.944 |
| 9  | 21991923  | rs2811710   | A/G | intronic     | CDKN2A         | A=0.619 |
| 9  | 25678639  | rs61483294  | G/A | UTR5         | TUSC1          | G=0.940 |
| 9  | 90262000  | rs76327212  | A/G | intronic     | DAPK1          | A=0.989 |
| 9  | 90120907  | rs79213339  | G/A | intronic     | DAPK1          | G=0.983 |
| 10 | 101287764 | rs10883365  | G/A | ncRNA_exonic | LINC01475      | G=0.507 |

|    |           |             |     |              |            |         |
|----|-----------|-------------|-----|--------------|------------|---------|
| 10 | 83697630  | rs10883951  | G/A | intronic     | NRG3       | G=0.769 |
| 10 | 83779609  | rs10884044  | G/C | intronic     | NRG3       | G=0.805 |
| 10 | 87431548  | rs10887514  | A/C | intronic     | GRID1      | A=0.735 |
| 10 | 88096047  | rs10887578  | G/C | intronic     | GRID1      | G=0.523 |
| 10 | 84672703  | rs111525280 | C/T | intronic     | NRG3       | C=0.940 |
| 10 | 83835232  | rs11192402  | C/A | intronic     | NRG3       | A=0.735 |
| 10 | 87887418  | rs11201891  | C/T | intronic     | GRID1      | C=0.970 |
| 10 | 83940514  | rs114298958 | C/T | intronic     | NRG3       | C=0.983 |
| 10 | 83839871  | rs116895362 | G/T | intronic     | NRG3       | G=0.987 |
| 10 | 87795058  | rs117711043 | C/T | intronic     | GRID1      | C=0.974 |
| 10 | 6519237   | rs117775203 | C/T | intronic     | PRKCQ      | C=0.969 |
| 10 | 87660149  | rs12773496  | T/C | intronic     | GRID1      | T=0.983 |
| 10 | 6494196   | rs137882235 | C/G | intronic     | PRKCQ      | C=0.876 |
| 10 | 83894117  | rs140017377 | A/G | intronic     | NRG3       | A=0.987 |
| 10 | 83677273  | rs144352950 | G/T | intronic     | NRG3       | G=0.967 |
| 10 | 71923311  | rs144937416 | G/A | intronic     | SAR1A      | G=0.987 |
| 10 | 90751882  | rs148155729 | T/A | ncRNA_exonic | FAS-AS1    | T=0.967 |
| 10 | 83639836  | rs148421664 | T/C | intronic     | NRG3       | T=0.978 |
| 10 | 121416182 | rs149103600 | G/A | intronic     | BAG3       | G=0.976 |
| 10 | 84016070  | rs17099664  | T/C | intronic     | NRG3       | T=0.987 |
| 10 | 83875762  | rs1739766   | G/T | intronic     | NRG3       | T=0.536 |
| 10 | 83917680  | rs1896508   | A/G | intronic     | NRG3       | A=0.973 |
| 10 | 83747086  | rs191339664 | C/G | intronic     | NRG3       | C=0.989 |
| 10 | 87656075  | rs1917143   | T/A | intronic     | GRID1      | T=0.723 |
| 10 | 32336330  | rs211289    | T/G | intronic     | KIF5B      | T=0.966 |
| 10 | 133796291 | rs2282056   | T/C | upstream     | BNIP3      | T=0.814 |
| 10 | 89712473  | rs2673832   | G/A | intronic     | PTEN       | A=0.895 |
| 10 | 121407628 | rs34135944  | A/G | intergenic   | TIAL1,BAG3 | A=0.951 |
| 10 | 84570610  | rs516285    | C/G | intronic     | NRG3       | C=0.981 |
| 10 | 87938124  | rs56064086  | A/G | intronic     | GRID1      | A=0.937 |

|    |           |             |     |            |              |         |
|----|-----------|-------------|-----|------------|--------------|---------|
| 10 | 87994091  | rs61857817  | C/T | intronic   | GRID1        | C=0.979 |
| 10 | 87865009  | rs7082134   | A/G | intronic   | GRID1        | G=0.646 |
| 10 | 87819622  | rs71471187  | T/C | intronic   | GRID1        | T=0.985 |
| 10 | 84649426  | rs72821829  | A/T | intronic   | NRG3         | A=0.954 |
| 10 | 89637201  | rs74559740  | T/A | intronic   | PTEN         | T=0.984 |
| 10 | 84053298  | rs76164205  | G/T | intronic   | NRG3         | G=0.967 |
| 10 | 84391145  | rs77056587  | A/G | intronic   | NRG3         | A=0.986 |
| 10 | 33252094  | rs77677848  | T/G | intergenic | ITGB1,NRP1   | T=0.960 |
| 10 | 87680435  | rs78333648  | C/T | intronic   | GRID1        | C=0.881 |
| 10 | 87372193  | rs7906330   | C/T | intronic   | GRID1        | C=0.978 |
| 10 | 89716186  | rs79909788  | T/A | intronic   | PTEN         | T=0.973 |
| 10 | 87938800  | rs876859    | G/A | intronic   | GRID1        | G=0.958 |
| 10 | 90766596  | rs9658750   | A/G | intronic   | FAS          | A=0.855 |
| 11 | 72535083  | rs112951181 | A/C | intronic   | ATG16L2      | A=0.980 |
| 11 | 64965029  | rs113295247 | C/T | intronic   | CAPN1        | C=0.951 |
| 11 | 75560735  | rs113472062 | C/T | intronic   | UVRAG        | C=0.975 |
| 11 | 75533919  | rs11605679  | C/T | intronic   | UVRAG        | C=0.922 |
| 11 | 1788892   | rs143309009 | A/G | intergenic | CTSD,SYT8    | A=0.989 |
| 11 | 64675148  | rs143623527 | G/A | intronic   | ATG2A        | G=0.984 |
| 11 | 1780704   | rs149907533 | A/G | intronic   | CTSD         | A=0.982 |
| 11 | 104908237 | rs1699094   | C/T | intergenic | CASP1,CARD16 | C=0.957 |
| 11 | 104813100 | rs34436514  | A/G | downstream | CASP4        | A=0.775 |
| 11 | 72537072  | rs3765638   | G/A | intronic   | ATG16L2      | G=0.810 |
| 11 | 64957016  | rs4492832   | C/G | intronic   | CAPN1        | G=0.813 |
| 11 | 1777969   | rs61869049  | C/T | intronic   | CTSD         | C=0.985 |
| 11 | 1773663   | rs74362165  | G/A | downstream | CTSD         | G=0.918 |
| 11 | 46454428  | rs77161239  | G/A | intronic   | AMBRA1       | G=0.965 |
| 12 | 119623470 | rs11064698  | T/C | intronic   | HSPB8        | T=0.721 |
| 12 | 102273330 | rs111753435 | A/G | intronic   | DRAM1        | A=0.977 |
| 12 | 64884908  | rs11175414  | G/A | intronic   | TBK1         | G=0.984 |

|    |           |             |     |            |               |         |
|----|-----------|-------------|-----|------------|---------------|---------|
| 12 | 119631086 | rs117867844 | G/A | intronic   | HSPB8         | G=0.986 |
| 12 | 121740564 | rs144813769 | G/A | intergenic | CAMKK2,ANAPC5 | G=0.974 |
| 12 | 10371814  | rs150976941 | A/C | intronic   | GABARAPL1     | A=0.985 |
| 12 | 52462705  | rs183332071 | G/A | intergenic | NR4A1,ATG101  | G=0.977 |
| 12 | 6643927   | rs3741915   | T/G | UTR5       | GAPDH         | T=0.742 |
| 12 | 102287753 | rs4764664   | G/T | intronic   | DRAM1         | G=0.566 |
| 12 | 10367376  | rs58290036  | C/T | intronic   | GABARAPL1     | C=0.931 |
| 12 | 6640443   | rs71579330  | C/T | intronic   | NCAPD2        | C=0.973 |
| 13 | 49036460  | rs117540897 | C/T | intronic   | RB1           | C=0.988 |
| 13 | 49023767  | rs141276592 | G/A | intronic   | RB1           | G=0.979 |
| 13 | 37608993  | rs142078227 | T/C | intronic   | SUPT20H       | T=0.981 |
| 13 | 113949751 | rs9549380   | G/A | intergenic | CUL4A,LAMP1   | G=0.733 |
| 14 | 53165078  | rs10151414  | T/C | intergenic | ERO1A,PSMC6   | C=0.534 |
| 14 | 94855831  | rs1122629   | G/A | intronic   | SERPINA1      | A=0.508 |
| 14 | 73472723  | rs113290936 | C/T | intronic   | ZFYVE1        | C=0.946 |
| 14 | 55844094  | rs116917085 | C/T | intronic   | ATG14         | C=0.963 |
| 14 | 73480161  | rs138949716 | C/T | intronic   | ZFYVE1        | C=0.984 |
| 14 | 67831839  | rs148435097 | T/G | intronic   | EIF2S1        | T=0.983 |
| 14 | 53119682  | rs150650570 | C/T | intronic   | ERO1A         | C=0.984 |
| 14 | 24663105  | rs181951924 | G/A | intronic   | TM9SF1        | G=0.856 |
| 14 | 55878617  | rs185534171 | G/A | upstream   | ATG14         | G=0.988 |
| 14 | 24665007  | rs2234096   | T/G | upstream   | TM9SF1        | T=0.897 |
| 14 | 53109716  | rs35738167  | T/G | UTR3       | ERO1A         | G=0.545 |
| 14 | 55834585  | rs45470002  | A/G | UTR3       | ATG14         | A=0.960 |
| 14 | 96746979  | rs4900319   | T/C | downstream | ATG2B         | C=0.775 |
| 14 | 96814692  | rs61985188  | G/T | intronic   | ATG2B         | G=0.940 |
| 14 | 67827723  | rs77603679  | A/G | intronic   | EIF2S1        | A=0.976 |
| 14 | 67849857  | rs78552927  | C/A | intronic   | EIF2S1        | C=0.951 |
| 14 | 96797473  | rs8012399   | T/C | intronic   | ATG2B         | C=0.984 |
| 15 | 64284305  | rs76685257  | A/G | intronic   | DAPK2         | A=0.982 |

|    |          |             |     |                |                |         |
|----|----------|-------------|-----|----------------|----------------|---------|
| 15 | 66157289 | rs139615051 | T/C | intergenic     | DENND4A,RAB11A | T=0.979 |
| 16 | 28982517 | rs12050928  | T/C | intergenic     | NFATC2IP,SPNS1 | T=0.691 |
| 16 | 2123756  | rs141280935 | C/T | intronic       | TSC2           | C=0.983 |
| 16 | 2103686  | rs144712953 | T/C | intronic       | TSC2           | T=0.987 |
| 16 | 84754649 | rs145998836 | G/A | intronic       | USP10          | G=0.986 |
| 16 | 28505660 | rs151234    | G/C | upstream       | APOBR          | G=0.862 |
| 16 | 84771707 | rs181455560 | G/C | intronic       | USP10          | G=0.928 |
| 16 | 84808622 | rs2303231   | T/G | intronic       | USP10          | T=0.985 |
| 16 | 2259766  | rs26858     | A/G | intronic       | BRICD5         | A=0.506 |
| 16 | 2099232  | rs3760042   | A/G | intronic       | TSC2           | A=0.515 |
| 16 | 84744750 | rs6564068   | C/T | intronic       | USP10          | C=0.670 |
| 16 | 84745660 | rs67729455  | C/T | intronic       | USP10          | C=0.962 |
| 16 | 2103261  | rs7185742   | C/T | intronic       | TSC2           | C=0.989 |
| 16 | 84755825 | rs7202154   | A/C | intergenic     | KLHL36,USP10   | A=0.963 |
| 16 | 2130727  | rs9923663   | C/T | intronic       | TSC2           | C=0.671 |
| 17 | 73747520 | rs113424540 | G/A | intronic       | ITGB4          | G=0.963 |
| 17 | 78779170 | rs113943264 | C/A | ncRNA_exonic   | LOC101928855   | C=0.982 |
| 17 | 66418432 | rs11652161  | G/C | intronic       | PRKAR1A,WIPI1  | G=0.698 |
| 17 | 78865313 | rs117713965 | G/A | intronic       | RPTOR          | G=0.962 |
| 17 | 37860994 | rs118036166 | A/G | intronic       | ERBB2          | A=0.978 |
| 17 | 41319754 | rs12451738  | G/A | ncRNA_intronic | LOC101929767   | G=0.980 |
| 17 | 48146368 | rs12602101  | T/C | intronic       | ITGA3          | T=0.900 |
| 17 | 80574532 | rs12950772  | A/G | intronic       | WDR45B         | A=0.730 |
| 17 | 80603191 | rs12951801  | T/A | intronic       | WDR45B         | T=0.965 |
| 17 | 78720001 | rs138537551 | C/T | intronic       | RPTOR          | C=0.934 |
| 17 | 62126615 | rs140686727 | C/T | intronic       | ERN1           | C=0.974 |
| 17 | 41356042 | rs140827633 | C/T | intronic       | NBR1           | C=0.987 |
| 17 | 79808522 | rs144803881 | G/C | intronic       | P4HB           | G=0.982 |
| 17 | 4588600  | rs146174946 | C/A | intronic       | PELP1          | C=0.982 |
| 17 | 78922107 | rs149095681 | G/A | intronic       | RPTOR          | G=0.977 |

|    |          |             |     |                |               |         |
|----|----------|-------------|-----|----------------|---------------|---------|
| 17 | 76213642 | rs17878683  | A/G | intronic       | BIRC5         | A=0.967 |
| 17 | 78083155 | rs187534497 | G/A | intronic       | GAA           | G=0.983 |
| 17 | 48143686 | rs188978084 | T/C | intronic       | ITGA3         | T=0.985 |
| 17 | 73735326 | rs2010043   | C/A | intronic       | ITGB4         | C=0.880 |
| 17 | 41318153 | rs2175956   | G/C | ncRNA_intronic | LOC101929767  | G=0.606 |
| 17 | 66428751 | rs3897877   | C/T | intronic       | PRKAR1A,WIP1  | C=0.873 |
| 17 | 78524244 | rs4627412   | G/A | intronic       | RPTOR         | A=0.719 |
| 17 | 78938134 | rs55677452  | C/T | UTR3           | RPTOR         | C=0.967 |
| 17 | 79664583 | rs55842573  | C/T | intronic       | HGS           | C=0.942 |
| 17 | 74377161 | rs56324625  | G/C | intergenic     | PRPSAP1,SPHK1 | G=0.952 |
| 17 | 78883164 | rs6565489   | A/C | intronic       | RPTOR         | C=0.560 |
| 17 | 41332734 | rs72831075  | A/C | intronic       | NBR1          | A=0.903 |
| 17 | 78784728 | rs72853735  | A/G | intronic       | RPTOR         | A=0.865 |
| 17 | 78838310 | rs74534309  | G/T | intronic       | RPTOR         | G=0.759 |
| 17 | 78812175 | rs746405    | G/T | intronic       | RPTOR         | T=0.579 |
| 17 | 80585873 | rs75359963  | C/T | intronic       | WDR45B        | C=0.974 |
| 17 | 62156430 | rs76959113  | A/G | intronic       | ERN1          | A=0.967 |
| 17 | 7571752  | rs78378222  | T/G | UTR3           | TP53          | T=0.987 |
| 17 | 78878134 | rs78927876  | C/T | intronic       | RPTOR         | C=0.983 |
| 17 | 57864752 | rs80178956  | T/G | intronic       | VMP1          | T=0.974 |
| 17 | 78892647 | rs34048269  | G/A | intronic       | RPTOR         | G=0.788 |
| 17 | 48137168 | rs9894097   | C/T | intronic       | ITGA3         | C=0.900 |
| 18 | 60962957 | rs113885940 | T/G | intronic       | BCL2          | T=0.976 |
| 18 | 60805046 | rs11872403  | T/G | intronic       | BCL2          | T=0.543 |
| 18 | 60880068 | rs189035660 | T/C | intronic       | BCL2          | T=0.978 |
| 18 | 60988146 | rs62098660  | G/A | intergenic     | BCL2,KDSR     | G=0.524 |
| 18 | 60888801 | rs72943089  | G/A | intronic       | BCL2          | G=0.824 |
| 18 | 60931418 | rs72945034  | T/C | intronic       | BCL2          | T=0.902 |
| 18 | 60846430 | rs74625348  | G/C | intronic       | BCL2          | G=0.779 |
| 18 | 60977973 | rs78803499  | C/T | intronic       | BCL2          | C=0.961 |

|    |          |             |     |                |                  |         |
|----|----------|-------------|-----|----------------|------------------|---------|
| 19 | 36637605 | rs17882574  | A/G | intronic       | CAPNS1           | A=0.902 |
| 19 | 49378328 | rs595474    | C/T | intronic       | PPP1R15A         | C=0.889 |
| 19 | 3977762  | rs74995777  | G/A | ncRNA_intronic | MIR1268A         | G=0.974 |
| 20 | 62163012 | rs117890987 | C/T | intronic       | PTK6             | C=0.963 |
| 20 | 33129984 | rs143189192 | G/A | intronic       | PTK6             | G=0.980 |
| 20 | 32399200 | rs2626522   | C/G | intergenic     | DYNLRB1,MAP1LC3A | G=0.511 |
| 20 | 62159504 | rs310644    | G/A | upstream       | TP53INP2         | A=0.928 |
| 20 | 1364521  | rs6041880   | A/G | UTR5           | CHMP4B           | G=0.850 |
| 20 | 30286191 | rs6060775   | A/G | downstream     | PTK6             | A=0.561 |
| 20 | 62713640 | rs6090042   | G/A | ncRNA_intronic | FKBP1A-SDCBP2    | A=0.911 |
| 20 | 33287782 | rs6119510   | T/A | intronic       | BCL2L1           | T=0.586 |
| 20 | 33129835 | rs73103188  | T/C | intronic       | OPRL1            | C=0.963 |
| 22 | 22132196 | rs113229372 | T/C | intronic       | MAPK1            | T=0.973 |
| 22 | 39919408 | rs117826659 | G/A | downstream     | ATF4             | G=0.980 |
| 22 | 22211605 | rs11913063  | T/C | intronic       | MAPK1            | T=0.949 |
| 22 | 22216376 | rs140534946 | G/A | intronic       | MAPK1            | G=0.982 |
| 22 | 36662718 | rs140768119 | A/G | UTR3           | APOL1            | A=0.917 |
| 22 | 51063070 | rs141494339 | T/C | UTR3           | ARSA             | T=0.973 |
| 22 | 22132403 | rs28720995  | G/A | intronic       | MAPK1            | G=0.568 |
| 22 | 41222684 | rs55722734  | G/A | intronic       | ST13             | G=0.989 |
| 22 | 22121276 | rs61757965  | G/A | intronic       | MAPK1            | G=0.982 |
| 22 | 18259071 | rs8190251   | C/T | upstream       | LINC00528        | C=0.964 |
| 22 | 18222567 | rs8190330   | G/A | intronic       | BID              | G=0.979 |

Abbreviations: SNP, single nucleotide polymorphism; Chr, Chromosome; MAF, minor allele frequency; UTR, untranslated region; CEU, Northern and Western Europeans
