# Supplementary material for: Polymorphisms within Autophagy-Related Genes as Susceptibility Biomarkers for Multiple Myeloma: A Meta-Analysis of Three Large Cohorts and Functional Characterization
Source: MDPI journal article supplement (doi:10.3390/ijms24108500), 2023-05-09
Supplement: s1 [file s1]

**Supplementary Table 3.** Cell types analysed either in whole blood or peripheral mononuclear blood cells.

| Number | Name                                    | Parent  | Grandparent |
|--------|-----------------------------------------|---------|-------------|
| 1      | Leukocytes_CD45P_LMI1                   | None    | None        |
| 2      | Neutrophils_LMI1                        | 1       | None        |
| 3      | Monocytes_CD14P_LMI1                    | 1       | None        |
| 4      | Classical_monocytes_CD14PPCD16N_LMI1    | 3       | 1           |
| 5      | Intermediate_monocytes_CD14PPCD16P_LMI1 | 3       | 1           |
| 6      | NonClassical_monocytes_CD14PCD16P_LMI1  | 3       | 1           |
| 7      | Lymphocytes_LMI1                        | 1       | None        |
| 8      | T_cells_CD3P_CD56N_LMI1                 | 7       | 1           |
| 9      | NK_cells_CD3N_CD56P_LMI1                | 7       | 1           |
| 10     | NKT_cells_CD3P_CD56P_LMI1               | 7       | 1           |
| 11     | B_cells_CD19P_LMI1                      | 7       | 1           |
| 12     | CD4P_T_cells_LMI1                       | 8       | 7           |
| 13     | CD8P_T_cells_LMI1                       | 8       | 7           |
| 14     | DP_CD4P_CD8P_LMI1                       | 8       | 7           |
| 15     | DN_CD4N_CD8N_LMI1                       | 8       | 7           |
| 16     | CD4P_CD25high_Treg_LMI1                 | 12      | 8           |
| 17     | NK_dim_CD56P_CD16P_LMI1                 | 9       | 7           |
| 18     | NK_bright_CD56PP_CD16N_LMI1             | 9       | 7           |
| 19     | NK_CD56P_CD16N_LMI1                     | 9       | 7           |
| 20     | Leukocytes_CD45P_LMI2                   | justRef | justRef     |
| 21     | T_cells_CD3P_CD56N_LMI2                 | justRef | justRef     |
| 22     | CD4P_T_cells_LMI2                       | justRef | justRef     |
| 23     | CD8P_T_cells_LMI2                       | justRef | justRef     |
| 24     | CD45RON_CD45RAP_T_cells_LMI2            | 21      | 20          |
| 25     | CD45ROP_CD45RAP_T_cells_LMI2            | 21      | 20          |
| 26     | CD45ROP_CD45RAN_T_cells_LMI2            | 21      | 20          |
| 27     | CD45RON_CD45RAN_T_cells_LMI2            | 21      | 20          |
| 28     | CD4P_CD25P_CD127low_Treg_LMI2           | 22      | 21          |
| 29     | CD4P_Naive_CD45RAP_CD27P_LMI2           | 22      | 21          |
| 30     | CD4P_Eff_CD45RAP_CD27N_LMI2             | 22      | 21          |
| 31     | CD4P_EM_CD45RAN_CD27N_LMI2              | 22      | 21          |
| 32     | CD4P_CM_CD45RAN_CD27P_LMI2              | 22      | 21          |
| 33     | CD4P_Naive_CD45RON_CD27P_LMI2           | 22      | 21          |
| 34     | CD4P_Eff_CD45RON_CD27N_LMI2             | 22      | 21          |
| 35     | CD4P_EM_CD45ROP_CD27N_LMI2              | 22      | 21          |
| 36     | CD4P_CM_CD45ROP_CD27P_LMI2              | 22      | 21          |
| 37     | CD8P_Naive_CD45RAP_CD27P_LMI2           | 23      | 21          |
| 38     | CD8P_Eff_CD45RAP_CD27N_LMI2             | 23      | 21          |
| 39     | CD8P_EM_CD45RAN_CD27N_LMI2              | 23      | 21          |
| 40     | CD8P_CM_CD45RAN_CD27P_LMI2              | 23      | 21          |
| 41     | CD8P_Naive_CD45RON_CD27P_LMI2           | 23      | 21          |
| 42     | CD8P_Eff_CD45RON_CD27N_LMI2             | 23      | 21          |
| 43     | CD8P_EM_CD45ROP_CD27N_LMI2              | 23      | 21          |
| 44     | CD8P_CM_CD45ROP_CD27P_LMI2              | 23      | 21          |
| 45     | Lymphocytes_LMI3                        | justRef | justRef     |
| 46     | B_cells_CD3N_CD19P_LMI3                 | justRef | justRef     |
| 47     | CD27N_IgMP_LMI3                         | justRef | justRef     |
| 48     | CD19P_CD20N_Plasma_blasts_LMI3          | 47      | 46          |
| 49     | CD19P_CD20P_B_cells_LMI3                | 47      | 46          |
| 50     | IgDN_CD5PP_LMI3                         | 47      | 46          |
| 51     | IgDP_CD5PP_LMI3                         | 47      | 46          |
| 52     | IgDN_CD5P_LMI3                          | 47      | 46          |
| 53     | IgDP_CD5P_LMI3                          | 47      | 46          |
| 54     | CD24P_CD38P_LMI3                        | 47      | 46          |
| 55     | Transitional_B_cells_CD24PP_CD38PP_LMI3 | 47      | 46          |
| 56     | IgDN_IgMP_LMI3                          | 47      | 46          |
| 57     | IgDP_IgMP_LMI3                          | 47      | 46          |

|    |                                                    |         |         |
|----|----------------------------------------------------|---------|---------|
| 58 | IgDP_IgMN_LMI3                                     | 47      | 46      |
| 59 | IgDN_IgMN_LMI3                                     | 47      | 46      |
| 60 | Transitional_B_cell_CD27N_IgMP_CD24P_CD38high_LMI3 | 48      | 47      |
| 61 | Mature_naive_CD24P_CD38P_LMI3                      | 48      | 47      |
| 62 | IgMN_LMI3                                          | 55      | 47      |
| 63 | CD24P_CD38P_CD27P_IgMP_LMI3                        | 55      | 47      |
| 64 | Natural_effector_CD24P_CD38P_IgDP_IgMP_LMI3        | 55      | 47      |
| 65 | Plasmablast_IgDN_IgMN_CD38PP_LMI3                  | 60      | 47      |
| 66 | Class_switched_memory_IgDN_IgMN_CD38P_CD27P_LMI3   | 60      | 47      |
| 67 | IgDN_IgMN_CD27N_LMI3                               | 60      | 47      |
| 68 | Naive_B_cells_IgDP_IgMP_CD27N_LMI3                 | 58      | 47      |
| 69 | Memory_B_cells_IgDP_IgMP_CD27P_LMI3                | 58      | 47      |
| 70 | IgDN_IgMP_CD27N_LMI3                               | 57      | 47      |
| 71 | IgM_only_memory_IgDN_IgMP_CD27_LMI3                | 57      | 47      |
| 72 | IgMP_CD38PP_CD27P_LMI3                             | 57+58   | 47      |
| 73 | Class_non_switched_memory_IgMP_CD38P_CD27P_LMI3    | 57+58   | 47      |
| 74 | IgMP_CD27N_LMI3                                    | 57+58   | 47      |
| 75 | Lymphocytes_PBMC_LMI4                              | justRef | justRef |
| 76 | CD4P_T_cells_PBMC_LMI4                             | justRef | justRef |
| 77 | DP_CD4P_CD8P_PBMC_LMI4                             | justRef | justRef |
| 78 | DN_CD4N_CD8N_PBMC_LMI4                             | justRef | justRef |
| 79 | CD8P_T_cells_PBMC_LMI4                             | justRef | justRef |
| 80 | CD25N_CD127P_Tconv_PBMC_LMI4                       | justRef | justRef |
| 81 | CD4P_CD25P_CD127low_Treg_PBMC_LMI4                 | justRef | justRef |
| 82 | ProI_DN_CD4NCD8N_PBMC_LMI4                         | 80      | 77      |
| 83 | ProI_DP_CD4PCD8P_PBMC_LMI4                         | 79      | 77      |
| 84 | ProI_CD4P_Tconv_PBMC_LMI4                          | 82      | 78      |
| 85 | ProI_CD4P_Treg_PBMC_LMI4                           | 83      | 78      |
| 86 | ProI_CD8_PBMC_LMI4                                 | 81      | 77      |
| 87 | Treg_FOXP3P_HeliosP_PBMC_LMI4                      | 83      | 78      |
| 88 | Treg_FOXP3P_HeliosN_PBMC_LMI4                      | 83      | 78      |
| 89 | Treg_CD45RAP_PBMC_LMI4                             | 83      | 78      |
| 90 | Treg_CD45RAN_PBMC_LMI4                             | 83      | 78      |
| 91 | Treg_HLANDRP_PBMC_LMI4                             | 83      | 78      |

**NOTE:** Cells included in LMI1-3 were measured in whole blood and those included LIM4 in PBMCs.
